# Supplementary material
Source: PubMed Central journal article supplement (PMC8992805)
Supplement: Supp_Fig1.pdf [file Supp_Fig1.pdf]

## Supplementary Data

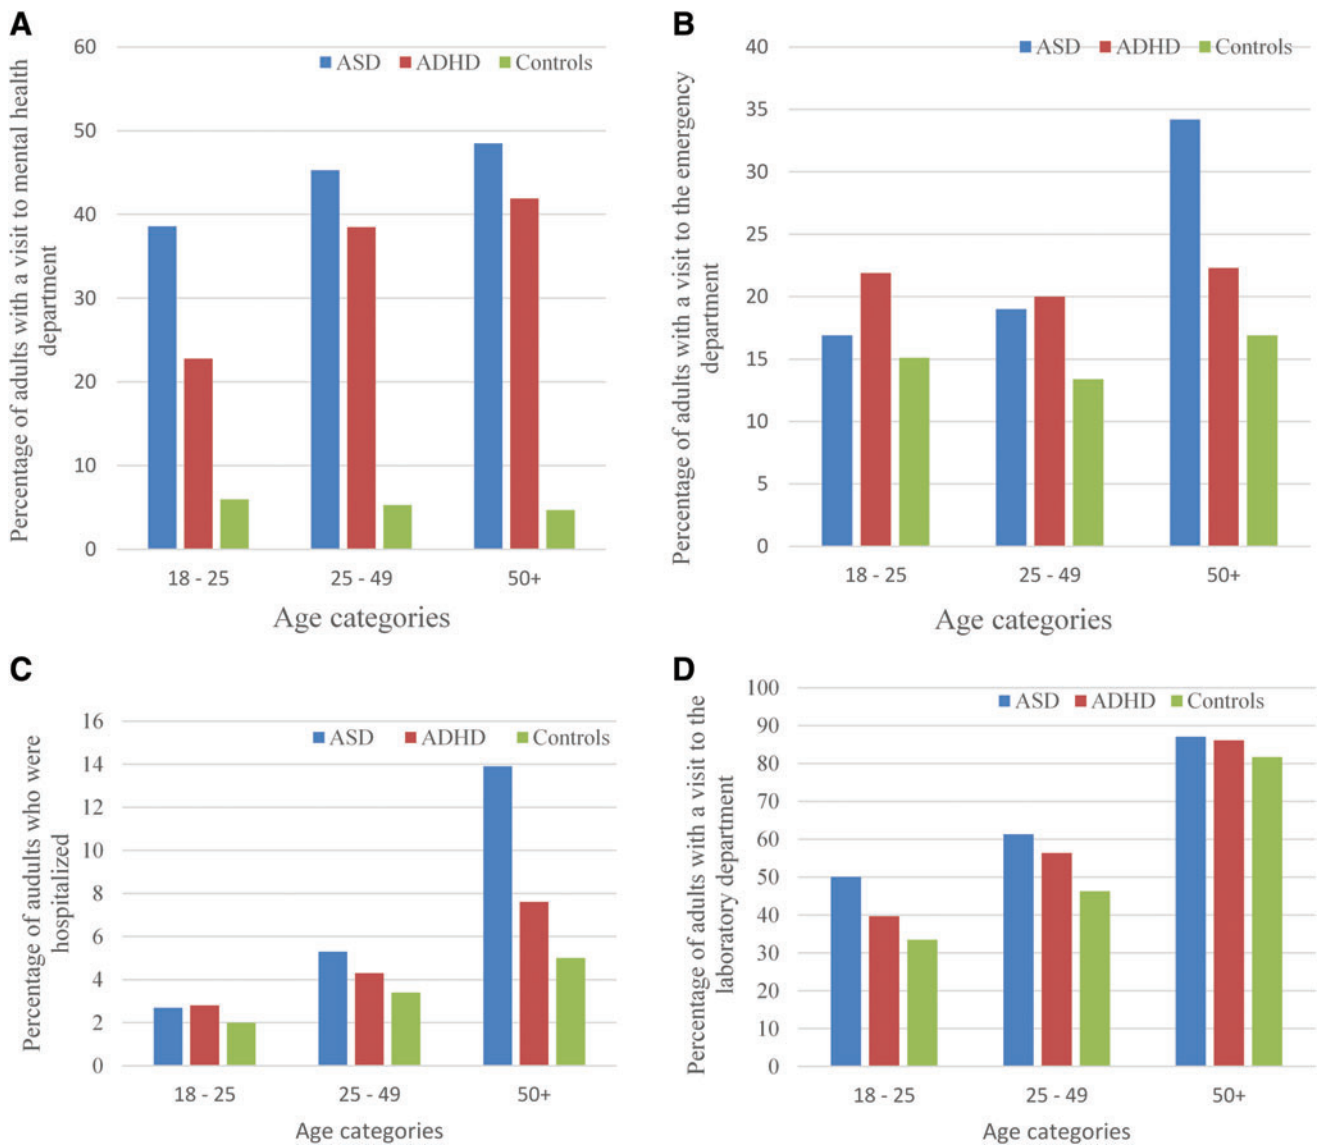

**SUPPLEMENTARY FIG. S1.** Healthcare service utilization by case status and age categories. **(A)** Mental health department. **(B)** Emergency department. **(C)** Hospitalization. **(D)** Laboratory department. ASD, autism spectrum disorder; ADHD, attention-deficit/hyperactivity disorder.
